# Supplementary material for: Phase 3 Randomized, Multicenter, Placebo-Controlled Study to Evaluate Safety, Immunogenicity, and Lot-to-Lot Consistency of an Adjuvanted Cell Culture-Derived, H5N1 Subunit Influenza Virus Vaccine in Healthy Adult Subjects
Source: MDPI journal article supplement (doi:10.3390/vaccines10040497), 2022-03-23
Supplement: s1 [file s1]

# Phase 3 Randomized, Multicenter, Placebo-Controlled Study to Evaluate Safety, Immunogenicity, and Lot-to-Lot Consistency of an Adjuvanted Cell Culture-Derived, H5N1 Subunit Influenza Virus Vaccine in Healthy Adult Subjects

James Peterson, Esther Van Twuijver, Eve Versage and Matthew Hohenboken

**Table S1.** Immune responses (GMT and GMR) against aH5N1 on Days 1, 22, 43, and 183 by CHMP age group.<sup>a</sup>

|                             | Age 18 to <60 years        |                  | Age ≥60 years           |                  |
|-----------------------------|----------------------------|------------------|-------------------------|------------------|
|                             | aH5N1c                     | Placebo          | aH5N1c                  | Placebo          |
| Day 1, n                    | 980                        | 331              | 1269                    | 408              |
| GMT (95% CI)                | 13.0 (12.3–13.8)           | 13.4 (12.2–14.7) | 20.1 (19.1–21.3)        | 20.1 (18.3–22.0) |
| Day 22, n                   | 979                        | 329              | 1266                    | 407              |
| GMT (95% CI)                | 51.1 (47.9–54.6)           | 11.2 (10.0–12.5) | 42.9 (40.5–45.3)        | 14.4 (13.1–15.9) |
| GMR, Day 22/Day 1 (95% CI)  | <b>3.92</b> (3.67–4.18)    | 0.85 (0.76–0.96) | <b>2.22</b> (2.10–2.35) | 0.75 (0.68–0.82) |
| Day 43, n                   | 947                        | 309              | 1209                    | 391              |
| GMT (95% CI)                | 177.4 (166.2–189.4)        | 10.7 (9.5–11.9)  | 100.7 (95.0–106.7)      | 16.2 (14.7–17.9) |
| GMR, Day 43/Day 1 (95% CI)  | <b>13.44</b> (12.59–14.35) | 0.81 (0.72–0.90) | <b>5.18</b> (4.88–5.49) | 0.83 (0.76–0.92) |
| Day 183, n                  | 899                        | 302              | 1180                    | 385              |
| GMT (95% CI)                | 20.4 (19.3–21.7)           | 6.7 (6.0–7.4)    | 19.3 (18.3–20.4)        | 8.5 (7.7–9.3)    |
| GMR, Day 183/Day 1 (95% CI) | 1.56 (1.47–1.66)           | 0.51 (0.46–0.57) | 0.99 (0.94–1.05)        | 0.44 (0.40–0.48) |

Abbreviations: CHMP, Committee for Medicinal Products for Human Use; CI, confidence interval; GMT, geometric mean titer; GMR, geometric mean ratio. <sup>a</sup> Boldface indicates CHMP criteria for GMR were met, i.e., GMR >2.5 for subjects aged 18 to <60 years and >2.0 for subjects aged ≥60 years.

**Table S2.** Percentages of subjects (95% CI) achieving seroconversion in HI titer.<sup>a</sup>

|                               | Age 18 to <60 years     |               | Age ≥60 years           |               |
|-------------------------------|-------------------------|---------------|-------------------------|---------------|
|                               | aH5N1c                  | Placebo       | aH5N1c                  | Placebo       |
| Day 22, n                     | 979                     | 329           | 1266                    | 407           |
| Seroconversion, %<br>(95% CI) | <b>42.2</b> (39.1–45.4) | 1.5 (0.5–3.5) | 24.6 (22.2–27.0)        | 0.7 (0.2–2.1) |
| Day 43, n                     | 947                     | 309           | 1209                    | 391           |
| Seroconversion, %<br>(95% CI) | <b>81.6</b> (79.0–84.0) | 0.3 (0.0–1.8) | <b>55.4</b> (52.6–58.2) | 1.5 (0.6–3.3) |
| Day 183, n                    | 899                     | 302           | 1180                    | 385           |
| Seroconversion, %<br>(95% CI) | 17.0 (14.6–19.6)        | 0.3 (0.0–1.8) | 8.2 (6.7–9.9)           | 1.0 (0.3–2.6) |

Abbreviations: CHMP, Committee for Medicinal Products for Human Use; CI, confidence interval; HI, hemagglutination inhibition. <sup>a</sup> Seroconversion was defined as either a prevaccination (baseline) HI titer <1:10 and postvaccination HI titer ≥1:40 or a prevaccination HI titer ≥1:10 and a ≥4-fold increase in postvaccination HI antibody titer. Boldface indicates CHMP criteria for seroconversion were met, i.e., the percentage of subjects with seroconversion was ≥40% for subjects aged <60 years and ≥30% for subjects aged ≥60 years.
